# Supplementary material
Source: PubMed Central journal article supplement (PMC6647844)
Supplement: NIHMS1041246-supplement-2.pdf [file NIHMS1041246-supplement-2.pdf]

SUPPLEMENTAL INFORMATION

# Cysteine-rich Granulin-3 Rapidly Promotes Amyloid- $\beta$ Fibrils in Both Redox States.

Anukool A. Bhopatkar, Gaurav Ghag, Lauren M. Wolf, Dexter N. Dean, Melissa A. Moss, and Vijayaraghavan Rangachari

FIGURE S1:

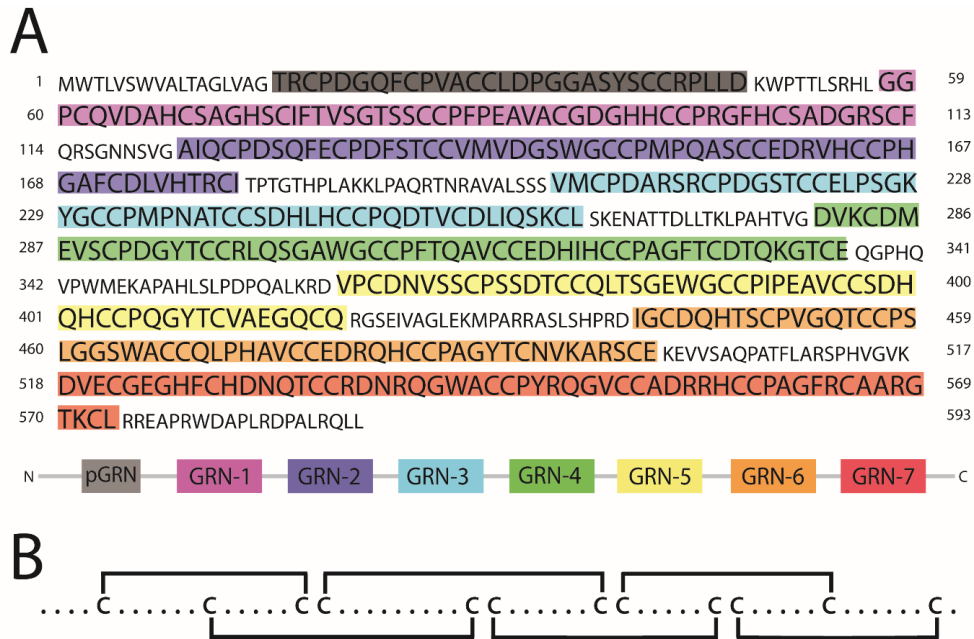

(A) The amino acid sequence of PGRN. Highlighted in colors are seven GRN domains (GRNs 1-7) and a partial domain of para-GRN domain (pGRN). A schematic representation of these domains is shown below the sequence. The linker regions between the domains contain proteolytic cleavage sites that generate the individual GRNs. (B) Schematic diagram of the conserved, putative disulfide bonding pattern within GRNs. Each GRN contains twelve conserved cysteine residues with the exception of GRN-1 and pGRN, which contain only ten and six cysteines, respectively.

**FIGURE S2:**

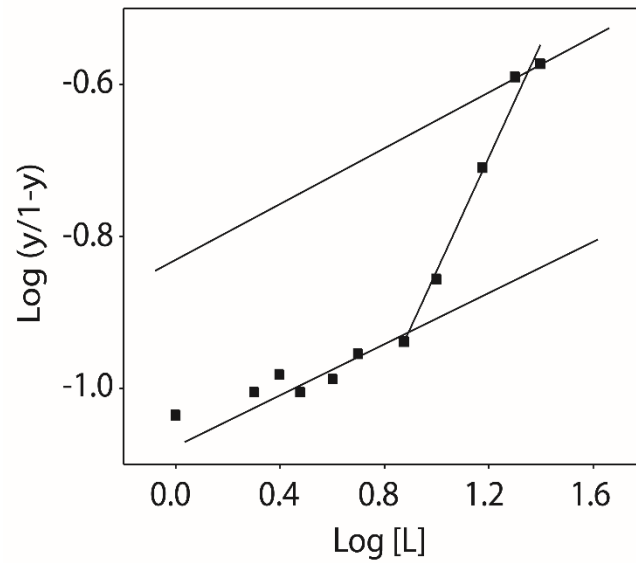

Hill plot determining the co-operativity between GRN-3 and A $\beta$ . The anisotropy data ( $r$ ) for titration of TMR-A $\beta$  with GRN-3 (in Figure 1A) was normalized and plotted as a double log plot as shown based on the Hill equation. The data was fitted using three linear fits as shown. Slope of the middle line 0.74 reveals a positive cooperative nature of binding between the two proteins.
